# Supplementary material for: Reliable prediction of childhood obesity using only routinely collected EHRs may be possible
Source: PubMed Central journal article supplement — Obes Pillars. 2024 Sep 10;12:100128. doi: 10.1016/j.obpill.2024.100128 (PMC11417568; doi:10.1016/j.obpill.2024.100128), 2024-09-10
Supplement: mmc1.pdf [file mmc1.pdf]

# Reliable prediction of childhood obesity using only routinely collected EHRs may be possible

**Rahmatollah Beheshti,**

*University of Delaware, Newark, DE, USA*

RBI@UDEL.EDU

**Mehak Gupta,**

*Southern Methodist University, Dallas, TX, USA*

MEHAKG@SMU.EDU

**Daniel Eckrich**

*Nemours Children's Health, Wilmington, DE, USA*

DANIEL.ECKRICH@NEMOURS.ORG

**H. Timothy Bunnell,**

*Nemours Children's Health, Wilmington, DE, USA*

TIM.BUNNELL@NEMOURS.ORG

**Thao-Ly T. Phan,**

*Nemours Children's Health, Wilmington, DE, USA*

THAOLY.PHAN@NEMOURS.ORG

## Appendix A. Nemours EHR

Nemours Children's Health, is a large network of pediatric health in the US, primarily spanning the states of Delaware, Florida, New Jersey, and Pennsylvania. The dataset is a portion of the larger PEDSnet dataset, containing EHR data from several major US Pediatric Health Systems [1]. It contains direct clinical data from nearly all clinical and healthcare interactions. Our data is extracted from over two million distinct patients from the Nemours EHR system with patient records dating from 2002 to 2019. The analysis dataset was further screened for inconsistencies particularly those related to birthdates and measurement dates, dropping records with missing or implausible dates. The dataset was anonymized. All of the dates were skewed randomly per patient by +/- 180 days. The data access and processing steps were approved by the Nemours institutional review board. Each record in our dataset relates to one visit and captures the visit start and end time and all the condition, procedure, medication, and measurement features recorded for that visit. It also contains demographic data for each patient. The medical codes are standardized terminologies of SNOMED-CT, RxNorm, CPT, and LOINC [2] for both clinical and demographic facts.

From 68,029 children EHR data from Nemours, 65,725 children had weight and length measurements during at least 2 routine infant checkups before age 2, which are generally scheduled at ages 1, 3, 6, 9, 12, 18, and 24 months. Of them, 37,844 children had at least one weight and height measurement between 2 to age 10. We excluded 1,653 children whose year of birth could not be verified, leaving 36,191 patients for the construction of a prediction model for childhood obesity. Figure 1 shows the steps we took to extract our cohort of 36,191 patients for the model construction.

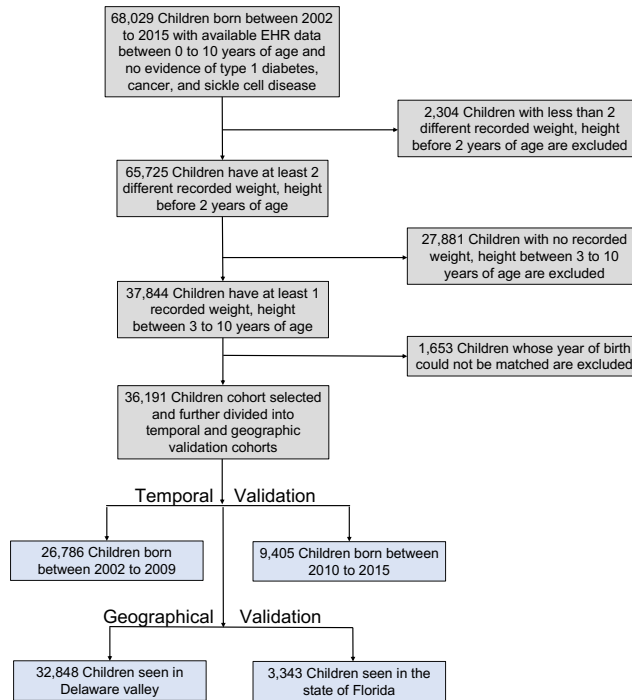

Figure S 1: The cohort selection steps. Temporal and geographic validation regimes are shown in gray.

Table S 1: Demographic analysis of excluded patients.

| <b>All</b><br>(n=28,532) |          |               |
|--------------------------|----------|---------------|
| <b>Sex:</b>              |          |               |
| Female                   | Count(%) | 12,479(43.74) |
| Male                     | Count(%) | 16,052(56.26) |
| <b>Ethnicity:</b>        |          |               |
| Hispanic                 | Count(%) | 3,606(12.64)  |
| Non-Hispanic             | Count(%) | 24,925(87.36) |
| <b>Race:</b>             |          |               |
| Asian                    | Count(%) | 485(1.70)     |
| Black                    | Count(%) | 12,879(45.14) |
| White                    | Count(%) | 12,633(44.27) |
| Other                    | Count(%) | 3,053(10.70)  |
| <b>Payer:</b>            |          |               |
| Private                  | Count(%) | 12,706(44.53) |
| Public                   | Count(%) | 15,826(55.47) |

The cohort was further divided according to date of birth for temporal validation: data of 26,786 children who were born between January 1, 2002, and December 31, 2009, were included as a training set, and data of 9,405 children who were born between January 1, 2010, and December 31, 2015, were included in the temporal test set, respectively. For geographic validation cohort was divided according to the location of the facility visited: data of 32,848 children seen in Delaware Valley located in the northeastern US, were included as a training set, and data of 3,343 children seen at different facilities across Florida, located in the southeastern US, were included in the geographic test set, respectively.

## Appendix B. Feature Generation Methods

The original dataset consisted of 20,298 diagnoses, 6,077 medications, and 7,693 measurements (lab-results) features. On average, 22 diagnoses, 15 medications, and 49 measurement features were recorded per patient in the data. To identify a subset of clinically-relevant features to childhood obesity, we have used a data-driven approach coupled with input from a panel of childhood obesity experts from the PEDSnet Healthy Weight Network [3].

A total of 506 features were constructed from the dataset. We selected 71 clinical diagnoses codes that fall under broader categories of obesity-related comorbidities: cardiovascular, gastrointestinal, genetic, metabolic, neuropsychological, orthopedic, and pulmonary. We also selected 67 family history diagnoses available in our dataset recorded in the patient’s EHR. We grouped all medication codes in our dataset into 84 ATC-3 groups. Measurements features were first arranged in the decreasing order of their availability in our dataset and then with the help of clinical experts, we selected 51 measurements from the top 70 measurements with the help of clinical experts. All these steps taken to select the list of features were verified by clinical experts on our team. The following sections describe the feature selection and generation mechanism for each data type.

### B.1 Demographic Features

Gender, race, ethnicity, and payer information were extracted from EHR data. Each of these features is divided into categories: Gender - Male and Female, race - Black, White, Asian, and Other, ethnicity - Hispanic, and Non-Hispanic, and payer - Public and Private. We also included the Child Opportunity Index (COI) value for each patient by geolocating the last address of each patient before age 2 and mapping it to the neighborhood COI score. We used the Census Geocoder tool<sup>1</sup> for geolocating. COI combines indicators of educational (e.g., early childhood education enrollment, high school graduation rate), health and environment (e.g., access to healthy food, health insurance coverage), and socioeconomic opportunity (e.g., employment rate, median household income) for all US neighborhoods. We divided the COI score into deciles (10 percentile bins) to generate 10 categorical features for the COI score. In total, we get 20 demographic features.

---

1. <https://www.census.gov/programs-surveys/geography/technical-documentation/complete-technical-documentation/census-geocoder.html>

## B.2 Diagnoses

First, we used the MedDRA (MedDRA) hierarchy to group diagnoses. By grouping diagnoses, we reduced the number of diagnoses from a total of 20,298 to 1,457. We grouped condition codes with a patient count above 107 (mean patient count per condition code) using pt level grouping in MedDRA and condition codes with a patient count below 107 using hlt level groupings in MedDRA. Out of 1,457 diagnoses, 71 clinical diagnoses and 67 family history diagnoses were included in the study based on input from clinical experts.

## B.3 Medications

We used the ATC-3 codes to group 6,077 medications into 613 codes. Out of 613 ATC codes, 530 were excluded to include only medication codes that were present in more than 1% of the cohort population. The remaining 84 ATC codes were used as input features for model training.

## B.4 Measurements

Anthropometrics measurements: Weight and height measurements were used for Weight-for-Length (WFL) and BMI% calculations for ages below 2 years and above respectively. Weight-for-Length (WFL) values were segmented into 5 windows corresponding to ages 0–4 months, 4–8 months, 8–12 months, 12–18 months, and 18–24 months. If multiple measurements were recorded for a patient within a window, the most latest value was used. Weight and height values were treated as MCAR and imputed with a carry forward of the most recent value over the 5 windows. All other measurement values before age 2 were transformed into categorical features by dividing each value into five equal percentile bins. We also converted the change in WFL% values over 0–4 months, 4–8 months, 8–12 months, 12–18 months, and 18–24 months to 5-centile bins to generate 5 categorical features. We also used the last WFL% status (underweight, normal, overweight, or obesity) at age 2 for model input. BMI% values after age 2 were categorized into - obesity, overweight, underweight, and normal categories which generated 4 features. BMI% categories (underweight, normal, overweight, or obesity) at every age after the of 2 were used as input to predict the risk at future age points.

Laboratory Measurements: We selected 51 other measurements from EHR data and segmented them into 5 windows similar to anthropometric measurements. We then converted each measurement value into 5 equal percentile bins to convert each value into 5 categories corresponding to each percentile bin. This segmentation lead to the generation of 255 measurement features per individual.

## B.5 Feature Representation

All the height, weight, lab measurements, medications, and diagnoses after age 2 were segmented into 1-year time windows. Medications, diagnoses, and percentile-binned measurements are transformed into categorical values with 1 indicating the presence of that variable and 0 otherwise. These features were marked as not MCAR and the “missing” value was indicated by a dummy category.

All features generated from EHR data between 0 to age 2 were arranged chronologically based on the visit timestamps. There is no fixed order between features with the same timestamp. All data between 2 to age 10 which is binned into 1-year time intervals were represented as a binary vector with 1 if the value is observed in the 1-year time interval and 0 otherwise.

## Appendix C. Model Architecture

We adopted the recurrent neural network encoder-decoder architecture presented in our previous work [4]. Encoder is the neural network consisting of embedding layers (256-dimension) for diagnoses, medications, procedures, and measurements, two layers of LSTM cells (512-dimension). As shown in Figure S1, the LSTM encoder takes 0-2 years of EHR data as input and outputs its representation vector. All the features in 0-2 years of EHR data are arranged chronologically, where the order of events occurring at the same timestamps is random. The output representation vector obtained from the LSTM encoder is concatenated with demographic data representation. Demographic data is embedded into latent space using an embedding layer (256-dimension). This concatenated vector is given to the decoder as input. The decoder concatenates this vector with the EHR data from 3 to 7 years as applicable. The decoder can learn from different lengths of medical data. For example, if a patient had EHR data from 0 to 3 years of age, their EHR data vector for the third year is combined with the vector representation derived from the encoder. This combined vector is then used by the decoder network to predict the risk of obesity for the next 1, 2, and 3 years. The Decoder architecture in our previous work [4] is modified to contain three separate feed-forward networks with two fully-connected layers (512-dimension with leakyRelu of 0.1, 256-dimension, 0.2 dropout) for every future age-point for the next three years. There is a third sigmoid layer at the end of two fully-connected layers to give the final output. Each of these three separate feed-forward networks is used to simultaneously provide the risk of obesity for every future age-point in the next three years.

Attention is applied to the output of encoder LSTM to rank features in it [5]. Attention layers are non-linear feed-forward layers that give softmax scores to input features in the vector representation. This will help evaluate the model’s interpretation by analyzing the ranking of softmax scores given to the features.

## Appendix D. More on experiments

### D.1 Attentions scores

Bahdanau et al. [5] proposed this attention mechanism to automatically (soft-)search for parts of the input data that are relevant to predicting the output and assign an attention score to the predictors in the input data. Attention scores have been used in various clinical prediction models ([6, 7, 8, 9]) to provide interpretation into what predictors are more important in predicting the output of the model. A predictor’s attention score represents the weightage given to that predictor to predict the final output. These attention scores are used to obtain the weighted sum of all predictor latent representations to obtain the final

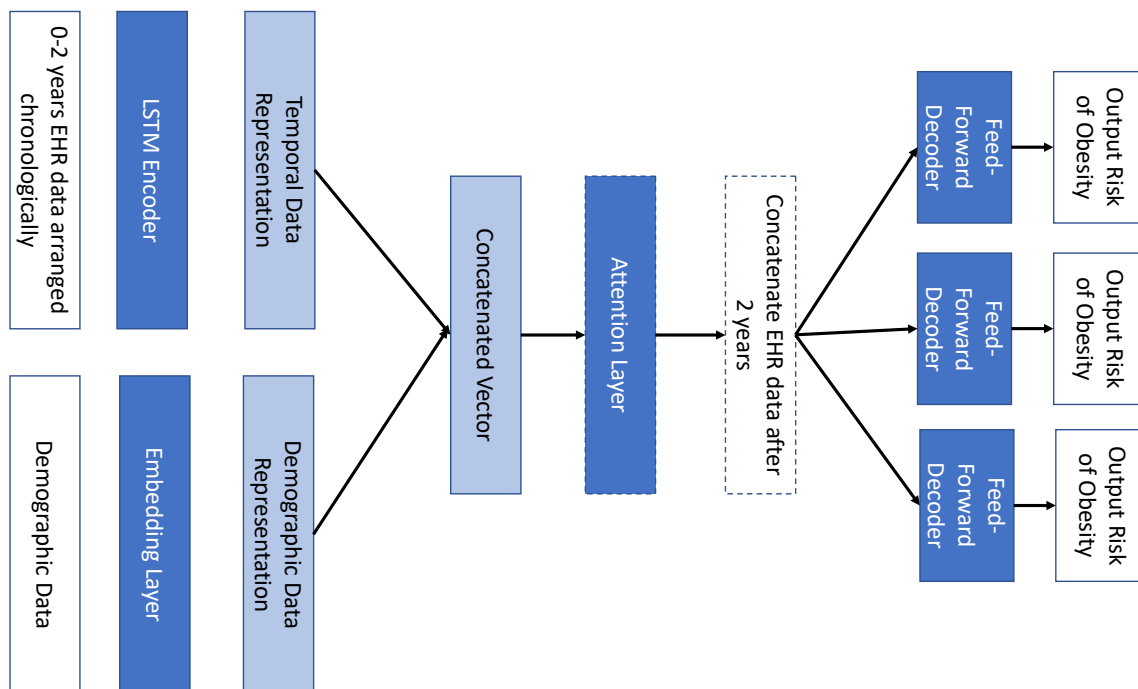

Figure S 2: Model Architecture. The dotted block is optional and is required for data after age 2.

representation of the patient which is then used to predict the risk of obesity. This method enables us to capture the nonlinear relation between a predictor’s impact on the prediction. We can therefore analyze predictor attributions at the individual level, by examining the attention score of the predictors. An analysis of predictor attribution was performed using attention scores from attention layers in the LSTM model [5].

## References

- [1] A Pediatric Learning Health System. Pedsnet: A pediatric learning health system, 2021. URL <https://pedsnet.org>.
- [2] A Pediatric Learning Health System. Pedsnet common data model, 2021. URL <https://pedsnet.org/data/common-data-model>.
- [3] Erinn T Rhodes, Thao-Ly T Phan, Elizabeth R Earley, Ihuoma Eneli, Matthew A Haemer, Nikki C Highfield, Saba Khan, Grace Kim, Shelley Kirk, Elizabeth Monti Sullivan, et al. Patient-Reported Outcomes to Describe Global Health and Family Relationships in Pediatric Weight Management. *Childhood Obesity*, 2023.
- [4] Mehak Gupta, Raphael Poulain, Thao-Ly T. Phan, H. Timothy Bunnell, and Rahmatollah Beheshti. Flexible-Window Predictions on Electronic Health Records. *Proceedings of the AAAI Conference on Artificial Intelligence*, 36(11):12510–12516, Jun. 2022. doi:

10.1609/aaai.v36i11.21520. URL <https://ojs.aaai.org/index.php/AAAI/article/view/21520>.

- [5] Dzmitry Bahdanau, Kyunghyun Cho, and Yoshua Bengio. Neural machine translation by jointly learning to align and translate. *arXiv preprint arXiv:1409.0473*, 2014.
- [6] Junyu Luo, Muchao Ye, Cao Xiao, and Fenglong Ma. Hitanet: Hierarchical time-aware attention networks for risk prediction on electronic health records. In *Proceedings of the 26th ACM SIGKDD International Conference on Knowledge Discovery & Data Mining*, pages 647–656, 2020.
- [7] Fenglong Ma, Radha Chitta, Jing Zhou, Quanzeng You, Tong Sun, and Jing Gao. Dipole: Diagnosis prediction in healthcare via attention-based bidirectional recurrent neural networks. In *Proceedings of the 23rd ACM SIGKDD international conference on knowledge discovery and data mining*, pages 1903–1911, 2017.
- [8] Enliang Xu, Shiwan Zhao, Jing Mei, Eryu Xia, Yiqin Yu, and Songfang Huang. Multiple mace risk prediction using multi-task recurrent neural network with attention. In *2019 IEEE International Conference on Healthcare Informatics (ICHI)*, pages 1–2. IEEE, 2019.
- [9] Jiebin Chu, Wei Dong, Kunlun He, Huilong Duan, and Zhengxing Huang. Using neural attention networks to detect adverse medical events from electronic health records. *Journal of biomedical informatics*, 87:118–130, 2018.
